# Supplementary material
Source: HighWire-hosted journal article supplement (https://erj.ersjournals.com/content/54/5/1901154)
Supplement: inline-supplementary-material-1 [file inline-supplementary-material-1.pdf]

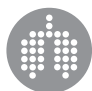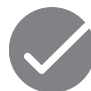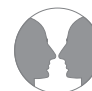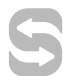

SHAREABLE PDF

# Accuracy of whole-genome sequencing to determine recent tuberculosis transmission: an 11-year population-based study in Hamburg, Germany

Roland Diel<sup>1,2,11</sup>, Thomas A. Kohl<sup>3,4,11</sup>, Florian P. Maurer<sup>4</sup>,  
Matthias Merker<sup>3,4</sup>, Karen Meywald Walter<sup>5</sup>, Jörg Hannemann<sup>5</sup>,  
Albert Nienhaus<sup>2,6</sup>, Philip Supply<sup>7,8,9,10</sup> and Stefan Niemann<sup>3,4</sup>

**Affiliations:** <sup>1</sup>Institute for Epidemiology, Schleswig-Holstein University Hospital, Kiel, Germany. <sup>2</sup>Institution for Statutory Accident Insurance and Prevention in the Health and Welfare Services (BGW), Hamburg, Germany. <sup>3</sup>Molecular and Experimental Mycobacteriology, Research Center Borstel, Borstel, Germany. <sup>4</sup>German Center for Infection Research, Partner Site Hamburg-Lübeck-Borstel-Riems, Borstel, Germany. <sup>5</sup>Public Health Department Hamburg-Central, Hamburg, Germany. <sup>6</sup>Institute for Health Services Research in Dermatology and Nursing, University Medical Center Hamburg-Eppendorf, Hamburg, Germany. <sup>7</sup>Univ. Lille, CNRS, Inserm, CHU Lille, Institut Pasteur de Lille, U1019 - UMR 8204 - CIL - Centre d'Infection et d'Immunité de Lille, Lille, France. <sup>8</sup>Centre National de la Recherche Scientifique (CNRS), Unité Mixte de Recherche (UMR) 8204, Center for Infection and Immunity of Lille, Lille, France. <sup>9</sup>Université Lille Nord de France, Center for Infection and Immunity of Lille, Lille, France. <sup>10</sup>Institut Pasteur de Lille, Center for Infection and Immunity of Lille, Lille, France. <sup>11</sup>Both authors contributed equally.

**Correspondence:** Roland Diel, Institute for Epidemiology, Schleswig-Holstein University Hospital, 24105 Kiel, Germany. E-mail: roland.diel@epi.uni-kiel.de

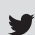

@ERSpublications

**WGS typing with a five-SNP c:d:ut-off delineates recent transmission chains with highest accuracy and also provides high-resolution resistance patterns, thus enabling direct clinical benefits** <http://bit.ly/2Pk37Wo>

**Cite this article as:** Diel R, Kohl TA, Maurer FP, *et al.* Accuracy of whole-genome sequencing to determine recent tuberculosis transmission: an 11-year population-based study in Hamburg, Germany. *Eur Respir J* 2019; 54: 1901154 [<https://doi.org/10.1183/13993003.01154-2019>].

This single-page version can be shared freely online.

## To the Editor:

Controlling human-to-human tuberculosis (TB) transmission is key for achieving the targets of the End TB Strategy set by the World Health Organization (WHO) [1, 2]. Stopping TB transmission, in large cities especially, is a challenging top priority worldwide [3]. Metropolitan areas have higher TB case notification rates than the rest of a country, as they concentrate high-risk groups, such as homeless people, drug users and migrants often from (other) high TB incidence settings. Opportunities for transmission are amplified by population density and complex social interactions, regularly leading to large, temporally extended transmission networks [3]. Targeted interventions to interrupt transmission require the combination of effective genotyping of TB strains with enhanced epidemiological investigation. While classic IS6110 DNA fingerprinting and 24-locus MIRU-VNTR (mycobacterial interspersed repetitive units-variable number of tandem repeats) typing provide standardised and easily computable typing results with an online nomenclature system, several studies have now demonstrated that whole-genome sequencing (WGS) has a superior discriminatory power, allowing for an unparalleled resolution of outbreak strains [4–10].

Copyright ©ERS 2019 This article is open access and distributed under the terms of the Creative Commons Attribution Non-Commercial Licence 4.0.

However, predictivity of WGS for detecting transmission in metropolitan areas has not yet been quantified *versus* most deterministic references, *i.e.* tangible epidemiological links identified by *ad hoc* investigation, at extended time and population scales.
